# Supplementary material for: Association of an inflammaging score based on IL-6, IL-10 and CXCL9, and frailty with long-term mortality in hospitalized older adults
Source: Springer Nature journal article supplement (doi:10.1186/s12979-025-00553-5), 2025-12-19

**Association of an inflammaging score based on IL-6, IL-10 and CXCL9, and frailty with long-term mortality in hospitalized older adults**

**ONLINE SUPPLEMENTAL MATERIALS**

**Supplemental Table 1.** Items evaluated for constructing the Frailty Index. .... 2

**Supplemental Table 2.** Distribution of main hospital admission diagnoses in the study population. 3

**Supplemental Table 3.** Gender differences..... 4

**Supplemental Table 4.** Distribution of IL-6, IL-10, CXCL9, and I3 score by Frailty Index and Charlson Comorbidity Index categories ..... 6

**Supplemental Table 5.** Cox proportional hazards models for long-term mortality ..... 7

**Supplemental Figure 1.** Kaplan–Meier survival curves according to Frailty Index and combined Frailty Index–I3 score categories. .... 8

**Supplemental Table 1. Items evaluated for constructing the Frailty Index.** Each item was scored as 0 (absent) or 1 (present).

| <b>Deficit</b>                                    |
|---------------------------------------------------|
| Living in a residential facility for older adults |
| Behavioral disturbances                           |
| Dementia                                          |
| Hearing impairment                                |
| Visual impairment                                 |
| Dependence to perform hygiene tasks               |
| Dependence on mobility                            |
| Dependence in bathing                             |
| Dependence on toilet use                          |
| Bedridden                                         |
| Dependence on eating                              |
| Urinary incontinence                              |
| Fecal incontinence                                |
| Heart failure                                     |
| Acute myocardial infarction                       |
| Hypertension                                      |
| Diabetes                                          |
| Stroke                                            |
| Parkinson's disease                               |
| Chronic kidney disease                            |
| Chronic obstructive pulmonary disease             |
| Osteoarthritis                                    |
| Cirrhosis                                         |
| Depression                                        |
| Cancer                                            |
| Falls                                             |
| Weight loss                                       |
| Dysphagia                                         |
| Pressure ulcers                                   |
| Use of medications                                |

**Supplemental Table 2. Distribution of main hospital admission diagnoses in the study population.**

|                                                   | <b>n (%)</b> |
|---------------------------------------------------|--------------|
| Diabetes                                          | 8 (0.8%)     |
| Metabolism and nutrition disorders                | 26 (2.6%)    |
| Delirium and other psychiatric disorders          | 9 (0.9%)     |
| Cerebrovascular disease                           | 137 (13.6%)  |
| Cancer                                            | 52 (5.2%)    |
| Anemia                                            | 48 (4.8%)    |
| Dementia or other disorders of the nervous system | 241 (23.9%)  |
| Heart failure and heart disease                   | 31 (3.1%)    |
| Hypertension or cardiac arrhythmias               | 48 (4.8%)    |
| Lung infections                                   | 124 (12.3%)  |
| Gastrointestinal pathologies                      | 113 (11.2%)  |
| Genitourinary pathologies                         | 61 (6.1%)    |
| Sepsis                                            | 23 (2.3%)    |
| Other                                             | 88 (8.7%)    |

**Supplemental Table 3. Gender differences**

|                                     | <b>Total</b><br>N=1,009 | <b>Male</b><br>N=472   | <b>Female</b><br>N=537 | <b>p</b> |
|-------------------------------------|-------------------------|------------------------|------------------------|----------|
| Age (years), median (IQR)           | 84 (80-88)              | 84 (79-88)             | 85 (80-89)             | 0.001    |
| IL-6 (pg/ml), median (IQR)          | 14.1 (5.94-39.9)        | 14.95 (6.605-39.35)    | 13.6 (5.58-40.5)       | 0.502    |
| IL-6 (pg/ml), n (%)                 |                         |                        |                        | 0.479    |
| ≤3.44                               | 118 (11.7%)             | 50 (10.6%)             | 68 (12.7%)             |          |
| 3.45-11.9                           | 333 (33%)               | 153 (32.4%)            | 180 (33.5%)            |          |
| ≥12.0                               | 558 (55.3%)             | 269 (57%)              | 289 (53.8%)            |          |
| IL-10 (pg/ml), median (IQR)         | 3.99 (2.71-6.26)        | 3.925 (2.72-6.09)      | 4.05 (2.69-6.4)        | 0.901    |
| IL-10 (pg/ml), n (%)                |                         |                        |                        | 0.871    |
| ≤3.27                               | 388 (38.5%)             | 182 (38.6%)            | 206 (38.4%)            |          |
| 3.28-40.4                           | 606 (60.1%)             | 282 (59.7%)            | 324 (60.3%)            |          |
| ≥40.5                               | 15 (1.5%)               | 8 (1.7%)               | 7 (1.3%)               |          |
| CXCL9 (pg/ml), median (IQR)         | 1697 (1043-3087)        | 1708.5 (1091.5-2981.5) | 1659 (1032-3188)       | 0.972    |
| CXCL9 (pg/ml), n (%)                |                         |                        |                        | 0.781    |
| ≤1706                               | 510 (50.5%)             | 234 (49.6%)            | 276 (51.4%)            |          |
| 1707-5759                           | 400 (39.6%)             | 189 (40%)              | 211 (39.3%)            |          |
| ≥5760                               | 99 (9.8%)               | 49 (10.4%)             | 50 (9.3%)              |          |
| SCORE, median (IQR)                 | 6 (5-7)                 | 6 (5-7)                | 6 (4-7)                | 0.393    |
| SCORE categories, n (%)             |                         |                        |                        | 0.568    |
| 1                                   | 244 (24.2%)             | 107 (22.7%)            | 137 (25.5%)            |          |
| 2                                   | 693 (68.7%)             | 330 (69.9%)            | 363 (67.6%)            |          |
| 3                                   | 72 (7.1%)               | 35 (7.4%)              | 37 (6.9%)              |          |
| 1+ lost ADL, n (%)                  | 339 (33.6%)             | 131 (27.8%)            | 208 (38.7%)            | 0.001    |
| 1+ lost IADL, n (%)                 | 607 (60.2%)             | 265 (56.1%)            | 342 (63.7%)            | 0.040    |
| CCI, median (IQR)                   | 2 (1-3)                 | 2 (1-3)                | 1 (1-2)                | 0.003    |
| Polypharmacy, n (%)                 | 641 (63.5%)             | 303 (64.2%)            | 338 (62.9%)            | 0.282    |
| Frailty Index, n (%)                |                         |                        |                        | 0.001    |
| <0.10                               | 187 (18.5%)             | 106 (22.5%)            | 81 (15.1%)             |          |
| 0.10-0.19                           | 359 (35.6%)             | 175 (37.1%)            | 184 (34.3%)            |          |
| ≥0.20                               | 463 (45.9%)             | 191 (40.5%)            | 272 (50.7%)            |          |
| Length of stay (days), median (IQR) | 8 (6-11)                | 7 (5-11)               | 8 (6-12)               | <0.001   |
| 1-year mortality, n (%)             | 241 (23.9%)             | 118 (25%)              | 123 (22.9%)            | 0.436    |
| Long-term mortality, n (%)          | 833 (82.6%)             | 399 (84.5%)            | 434 (80.8%)            | 0.121    |

| <b>Comorbidities</b>                            |                  |                   |                  |        |
|-------------------------------------------------|------------------|-------------------|------------------|--------|
| AMI, n (%)                                      | 143 (14.2%)      | 83 (17.6%)        | 60 (11.2%)       | 0.004  |
| CHF, n (%)                                      | 81 (8%)          | 32 (6.8%)         | 49 (9.1%)        | 0.171  |
| CeVD, n (%)                                     | 306 (30.3%)      | 139 (29.4%)       | 167 (31.1%)      | 0.579  |
| Dementia, n (%)                                 | 246 (24.4%)      | 103 (21.8%)       | 143 (26.6%)      | 0.076  |
| Depression, n (%)                               | 23 (2.3%)        | 8 (1.7%)          | 15 (2.8%)        | 0.243  |
| COPD, n (%)                                     | 174 (17.2%)      | 92 (19.5%)        | 82 (15.3%)       | 0.077  |
| Parkinson, n (%)                                | 82 (8.1%)        | 40 (8.5%)         | 42 (7.8%)        | 0.705  |
| Hypertension, n (%)                             | 622 (61.6%)      | 278 (58.9%)       | 344 (64.1%)      | 0.093  |
| CKD, n (%)                                      | 216 (21.4%)      | 111 (23.5%)       | 105 (19.6%)      | 0.126  |
| Anemia, n (%)                                   | 210 (20.8%)      | 99 (21%)          | 111 (20.7%)      | 0.905  |
| Sepsis, n (%)                                   | 46 (4.6%)        | 19 (4%)           | 27 (5%)          | 0.446  |
| Diabetes, n (%)                                 | 223 (22.1%)      | 109 (23.1%)       | 114 (21.2%)      | 0.476  |
| Cancer, n (%)                                   | 129 (12.8%)      | 78 (16.5%)        | 51 (9.5%)        | 0.001  |
| <b>Blood Parameters</b>                         |                  |                   |                  |        |
| Albumin, median (IQR)                           | 3.6 (3.2-4)      | 3.6 (3.2-4.1)     | 3.6 (3.2-3.9)    | 0.097  |
| eGFR (BIS1, mL/min),<br>median (IQR)            | 50.5 (36.9-61.5) | 50.8 (37.5-62.2)  | 50.5 (36.4-61.4) | 0.474  |
| NLR, median (IQR)                               | 4.0 (2.4-7.4)    | 4.1 (2.5-7.8)     | 3.8 (2.2-6.9)    | 0.125  |
| AST (U/L), median (IQR)                         | 17 (14-24)       | 18 (14.5-25.5)    | 17 (13-23)       | 0.019  |
| ALT (U/L), median (IQR)                         | 13 (10-21)       | 14 (10-22)        | 12 (10-19)       | <0.001 |
| Haemoglobin (g/dL),<br>median (IQR)             | 12 (10.5-13.4)   | 12.4 (10.8-14)    | 11.6 (10.2-12.9) | <0.001 |
| Platelets (n/mm <sup>3</sup> ), median<br>(IQR) | 204 (165-264)    | 190 (156-237)     | 223 (173-280)    | <0.001 |
| WBC (10 <sup>3</sup> µL), median<br>(IQR)       | 7.43 (5.83-9.74) | 7.62 (5.97-10.16) | 7.33 (5.7-9.56)  | 0.087  |
| Glucose (mg/dL), median<br>(IQR)                | 102 (89-125)     | 105 (91-130)      | 101 (88-122)     | 0.006  |

**Supplemental Table 4. Distribution of IL-6, IL-10, CXCL9, and I3 score by Frailty Index and Charlson Comorbidity Index categories**

|                             | <b>FI &lt; 0.10</b> | <b>FI = 0.10-0.19</b> | <b>FI ≥ 0.20</b> | <b>p</b>                    |
|-----------------------------|---------------------|-----------------------|------------------|-----------------------------|
| IL-6 (pg/ml), median (IQR)  | 10.4 (4.35-27.4)    | 11.6 (5.08-37.6)      | 17.9 (7.76-45.1) | <b>0.000<sup>b, c</sup></b> |
| IL-10 (pg/ml), median (IQR) | 3.38 (2.44-5.74)    | 3.56 (2.41-5.64)      | 4.38 (2.92-7.04) | <b>0.000<sup>b, c</sup></b> |
| CXCL9 (pg/ml), median (IQR) | 1366 (878-2254)     | 1484 (986-2670)       | 2051 (1194-3633) | <b>0.000<sup>b, c</sup></b> |
| I3score median (IQR)        | 5 (4-6)             | 6 (4-7)               | 6 (5-7)          | <b>0.000<sup>b, c</sup></b> |
|                             | <b>CCI = 0</b>      | <b>CCI = 1</b>        | <b>CCI ≥ 2</b>   | <b>p</b>                    |
| IL-6 (pg/ml), median (IQR)  | 16.5 (4.93-40.7)    | 12.6 (5.45-30.7)      | 14.9 (6.74-43.4) | 0.189                       |
| IL-10 (pg/ml), median (IQR) | 4.10 (2.52-6.75)    | 3.6 (2.44-5.55)       | 4.14 (2.85-6.43) | <b>0.016<sup>f</sup></b>    |
| CXCL9 (pg/ml), median (IQR) | 1338 (867-2313)     | 1583 (1018-2754)      | 1869 (1141-3576) | <b>0.000<sup>e, f</sup></b> |
| I3 score median (IQR)       | 6 (4-6)             | 6 (4-7)               | 6 (5-7)          | <b>0.004<sup>e, f</sup></b> |

a  $p < 0.05$  for Frailty Index < 0.10 vs Frailty Index = 0.10-0.19

b  $p < 0.05$  for Frailty Index < 0.10 vs Frailty Index ≥ 0.20

c  $p < 0.05$  for Frailty Index = 0.10-0.19 vs Frailty Index ≥ 0.20

d  $p < 0.05$  for CCI = 0 vs CCI = 1

e  $p < 0.05$  for CCI = 0 vs CCI ≥ 2

f  $p < 0.05$  for CCI = 1 vs CCI ≥ 2

CCI: Charlson Comorbidity Index; FI=Frailty Index

**Supplemental Table 5. Cox proportional hazards models for long-term mortality**

|                      | <b>Model 1</b>    | <b>Model 2</b>    | <b>Model 3a</b>   | <b>Model 3b</b>   | <b>Model 3c</b>   | <b>Model 3d</b>   |
|----------------------|-------------------|-------------------|-------------------|-------------------|-------------------|-------------------|
|                      | <b>HR (95%CI)</b> | <b>HR (95%CI)</b> | <b>HR (95%CI)</b> | <b>HR (95%CI)</b> | <b>HR (95%CI)</b> | <b>HR (95%CI)</b> |
| <b>IL-6</b>          |                   |                   |                   |                   |                   |                   |
| (pg/mL)              |                   |                   |                   |                   |                   |                   |
| ≤3.44                |                   |                   |                   |                   |                   |                   |
| 3.45-11.9            | 1.12 (0.87-1.44)  | 1.09 (0.85-1.42)  | 1.07 (0.83-1.39)  | -                 | -                 | -                 |
| ≥12.0                | 1.64 (1.28-2.10)  | 1.34 (1.03-1.74)  | 1.33 (1.02-1.73)  | -                 | -                 | -                 |
| <b>IL-10</b>         |                   |                   |                   |                   |                   |                   |
| (pg/mL)              |                   |                   |                   |                   |                   |                   |
| ≤3.27                |                   |                   |                   |                   |                   |                   |
| 3.28-40.4            | 1.49 (1.29-1.73)  | 1.23 (1.05-1.44)  | -                 | 1.21 (1.03-1.42)  | -                 | -                 |
| ≥40.5                | 3.75 (2.19-6.41)  | 2.69 (1.54-4.69)  | -                 | 2.59 (1.48-4.51)  | -                 | -                 |
| <b>CXCL9</b>         |                   |                   |                   |                   |                   |                   |
| (pg/mL)              |                   |                   |                   |                   |                   |                   |
| ≤1706                |                   |                   |                   |                   |                   |                   |
| 1707-5759            | 1.33 (1.14-1.54)  | 1.28 (1.09-1.50)  | -                 | -                 | 1.24 (1.05-1.45)  | -                 |
| ≥5760                | 1.95 (1.53-2.47)  | 1.73 (1.33-2.25)  | -                 | -                 | 1.69 (1.30-2.19)  | -                 |
| <b>SCORE</b>         |                   |                   |                   |                   |                   |                   |
| 3-4                  |                   |                   |                   |                   |                   |                   |
| 5-7                  | 1.72 (1.43-2.08)  | 1.50 (1.22-1.83)  | -                 | -                 | -                 | 1.48 (1.21-1.81)  |
| 8-9                  | 3.33 (2.46-4.51)  | 2.58 (1.86-3.58)  | -                 | -                 | -                 | 2.42 (1.74-3.37)  |
| <b>Frailty index</b> |                   |                   |                   |                   |                   |                   |
| <0.10                |                   |                   |                   |                   |                   |                   |
| 0.10-0.19            | 1.36 (1.07-1.72)  | 1.47 (1.16-1.87)  | 1.50 (1.19-1.90)  | 1.47 (1.15-1.86)  | 1.46 (1.15-1.86)  | 1.47 (1.15-1.86)  |
| ≥0.20                | 2.30 (1.79-2.94)  | 2.40 (1.87-3.08)  | 2.42 (1.89-3.11)  | 2.37 (1.85-3.05)  | 2.36 (1.84-3.04)  | 2.35 (1.83-3.02)  |

Model 1: Adjusted for age, sex, Charlson Comorbidity Index, and polypharmacy.

Model 2: Model 1 plus adjustment for routine laboratory parameters: albumin, estimated glomerular filtration rate (eGFR), neutrophil-to-lymphocyte ratio (NLR), aspartate aminotransferase (AST), alanine aminotransferase (ALT), hemoglobin, platelet count, white blood cell count (WBC), and glucose.

Models 3a–3d: Model 2 with the addition of frailty index, analyzed together with: 3a: IL-6 categories, 3b: IL-10 categories, 3c: CXCL9 categories, 3d: the I3 score,

Bold values indicate statistically significant hazard ratios ( $p < 0.05$ ).

**Supplemental Figure 1.** Kaplan–Meier survival curves according to Frailty Index and combined Frailty Index–I3 score categories. A. Survival curves stratified by Frailty Index (FI) categories: non-frail (FI <0.10), pre-frail (FI 0.10–0.19), and frail (FI ≥0.20). B. Survival curves stratified by the combination of Frailty Index categories and I3 score levels (low, intermediate, high).

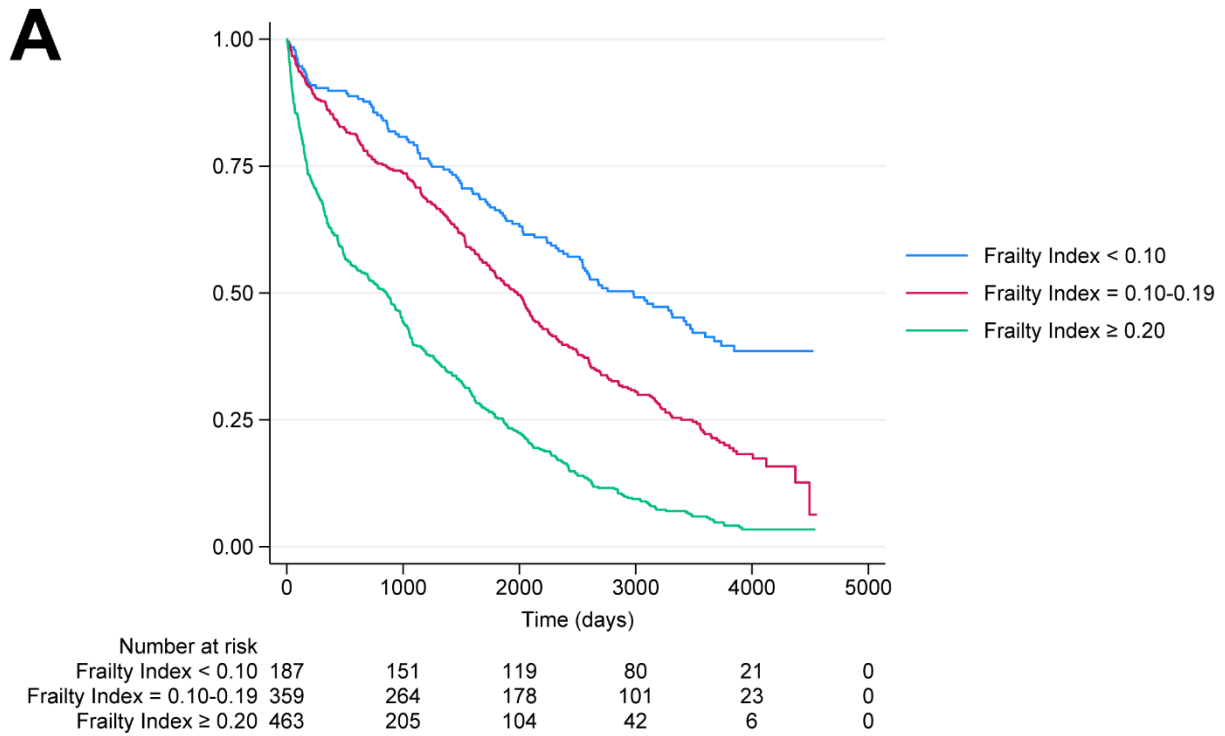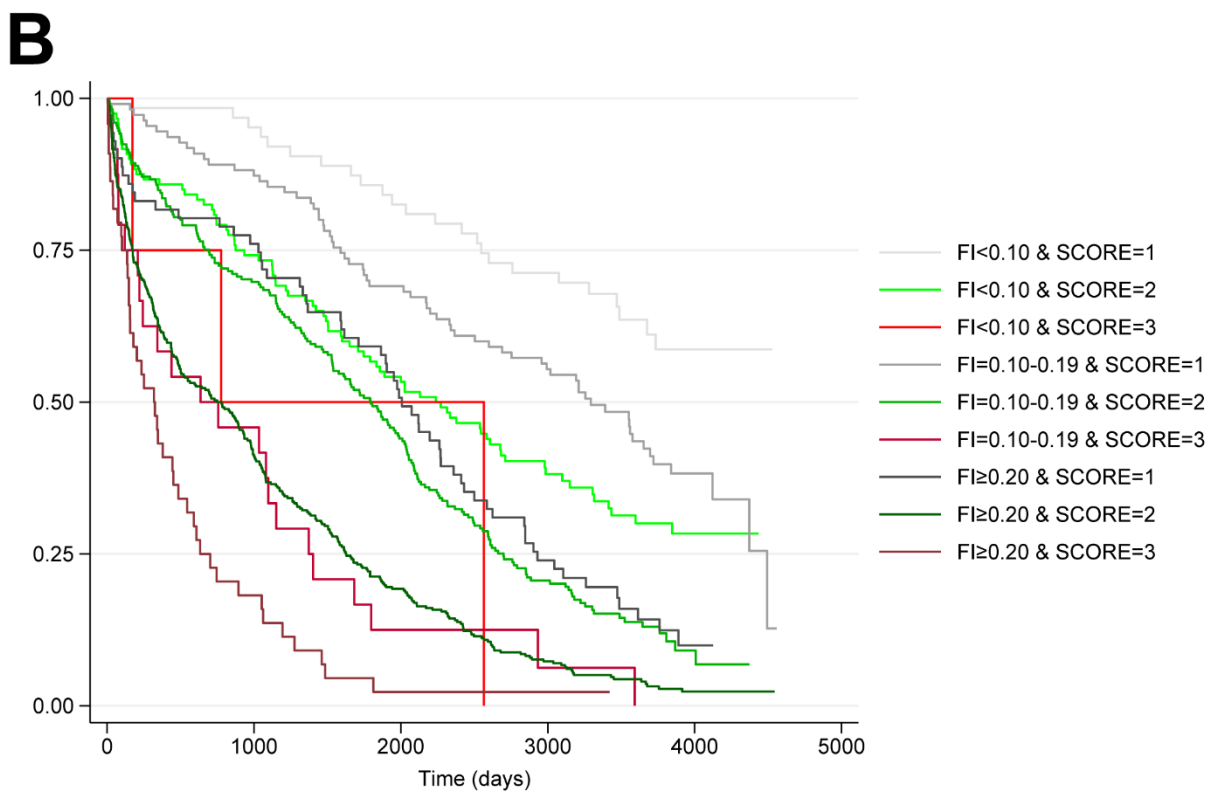

Supplement: MOESM1 [file 12979_2025_553_MOESM1_ESM.pdf]
